# Supplementary material for: Autoantibody Landscape in Patients with Advanced Prostate Cancer
Source: Oxford University Press journal article supplement (doi:10.1158/1078-0432.ccr-20-1966), 2020-09-23
Supplement: 10780432ccr201966-sup-243810_2_supp_6532926_qfsr0h.docx [file 10780432ccr201966-sup-243810_2_supp_6532926_qfsr0h.docx]

**Supplementary Figures S1-S9**

**Figure S1**. Enrichment differences in mutant vs. wild-type sequences by type of mutation in the prostate cancer cohort (*N*=72).

**Figure S2. (A)** PIWAS scores for all 72 prostate cancer patients. Orange indicates a PIWAS value greater than 6. Rows and columns are both clustered. (B) Correlations of PIWAS values across the prostate cancer samples.

**Figure S3.** Additional findings for *NY-ESO-1*. (A) Complete tiling data for *NY-ESO-1* for every protein included in the PIWAS analysis. (B) PIWAS values across time for *NY-ESO-1*.One line is shown per patient. (C) Correlation between PIWAS value and panel score. (D) Survival analysis segregated by panel score, where a panel score > 6 indicates “NY-ESO-1 panel(+)” and <6 indicates “NY-ESO-1 panel(–)”.


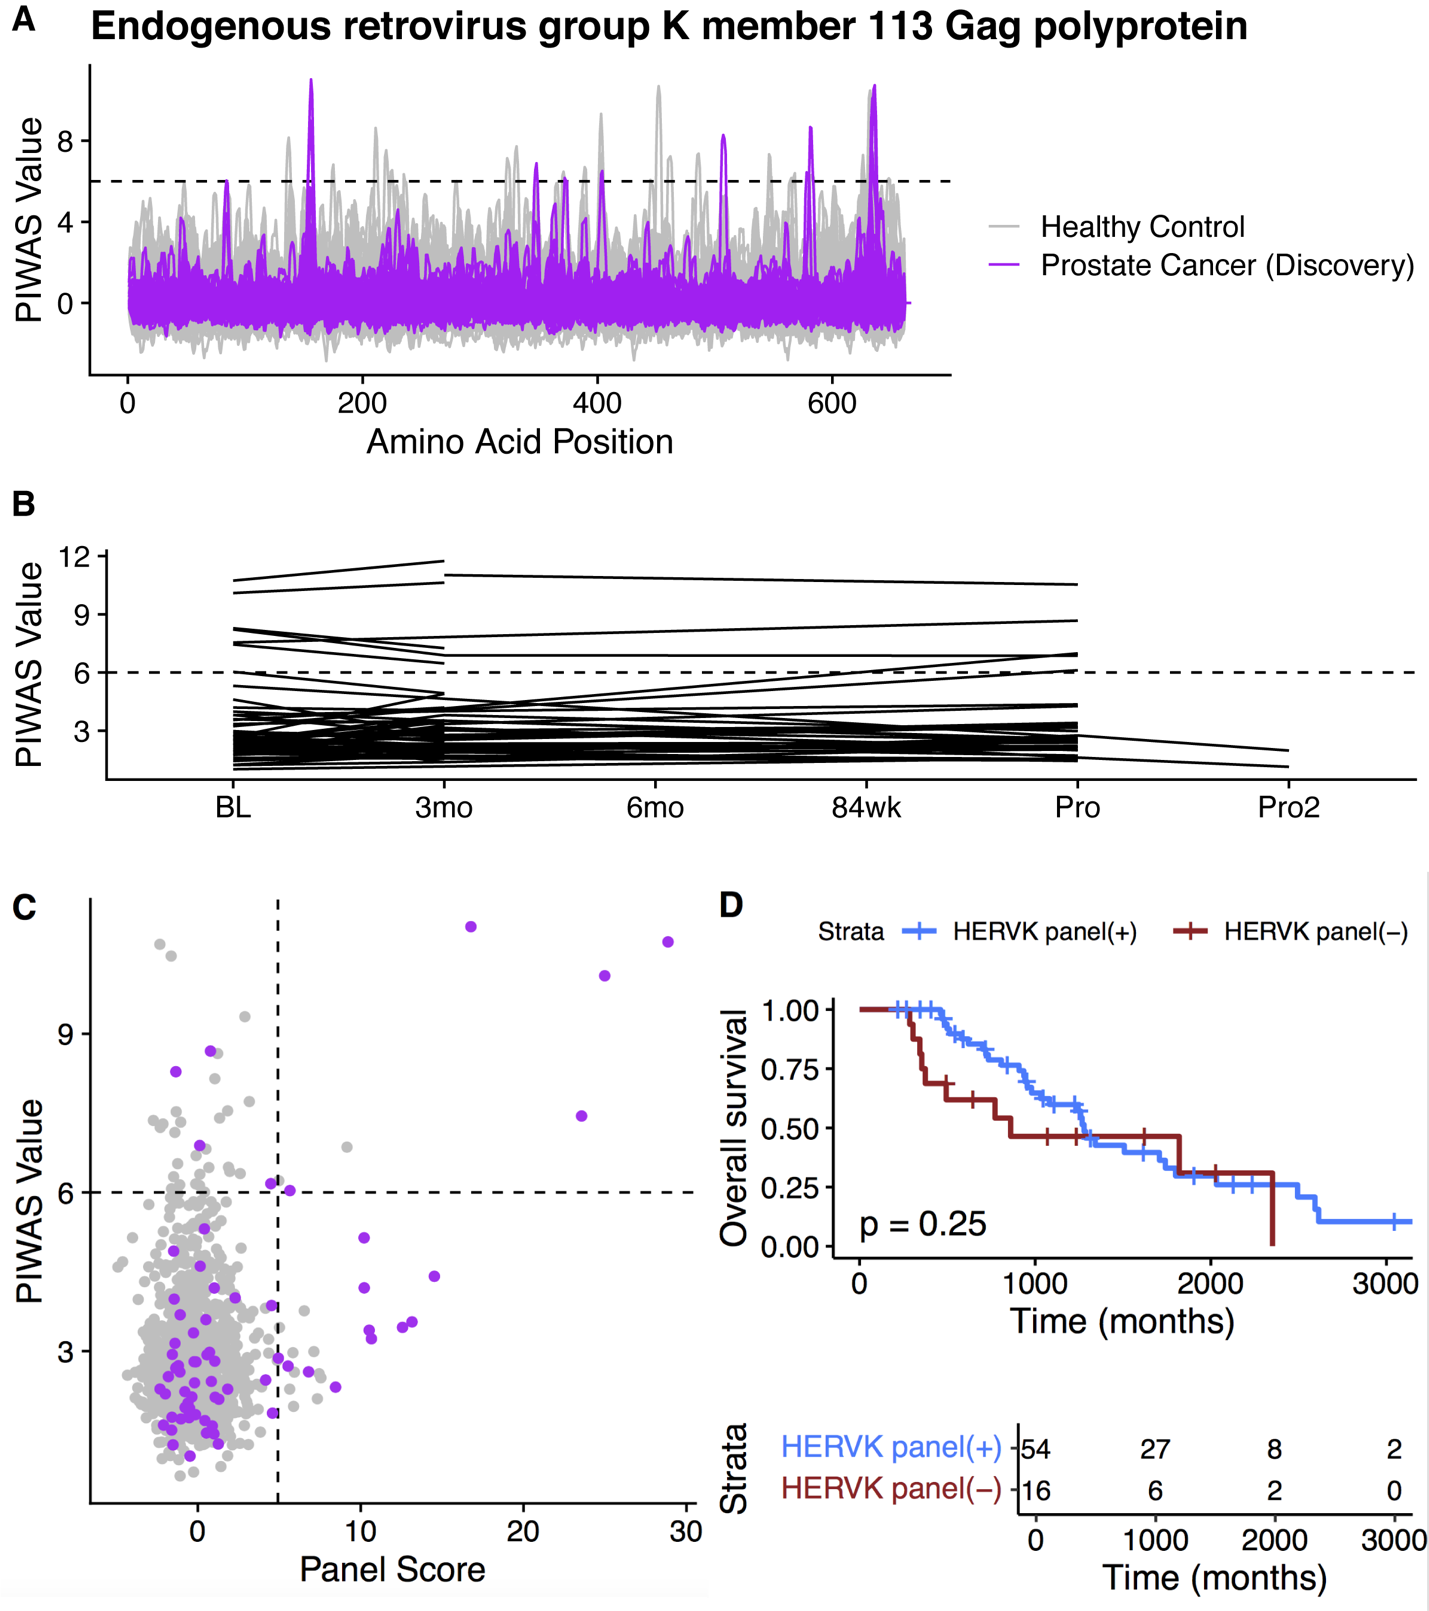


**Figure S4.** Additional findings for *HERVK-113*. (A) Complete tiling data for *HERVK-113* for every protein included in the PIWAS analysis. (B) PIWAS values across time for *HERVK-113*.One line is shown per patient. (C) Correlation between PIWAS value and panel score. (D) Survival analysis segregated by panel score, where a panel score > 6 indicates “HERVK-113 panel(+)” and <6 indicates “HERVK-113 panel(–)”.


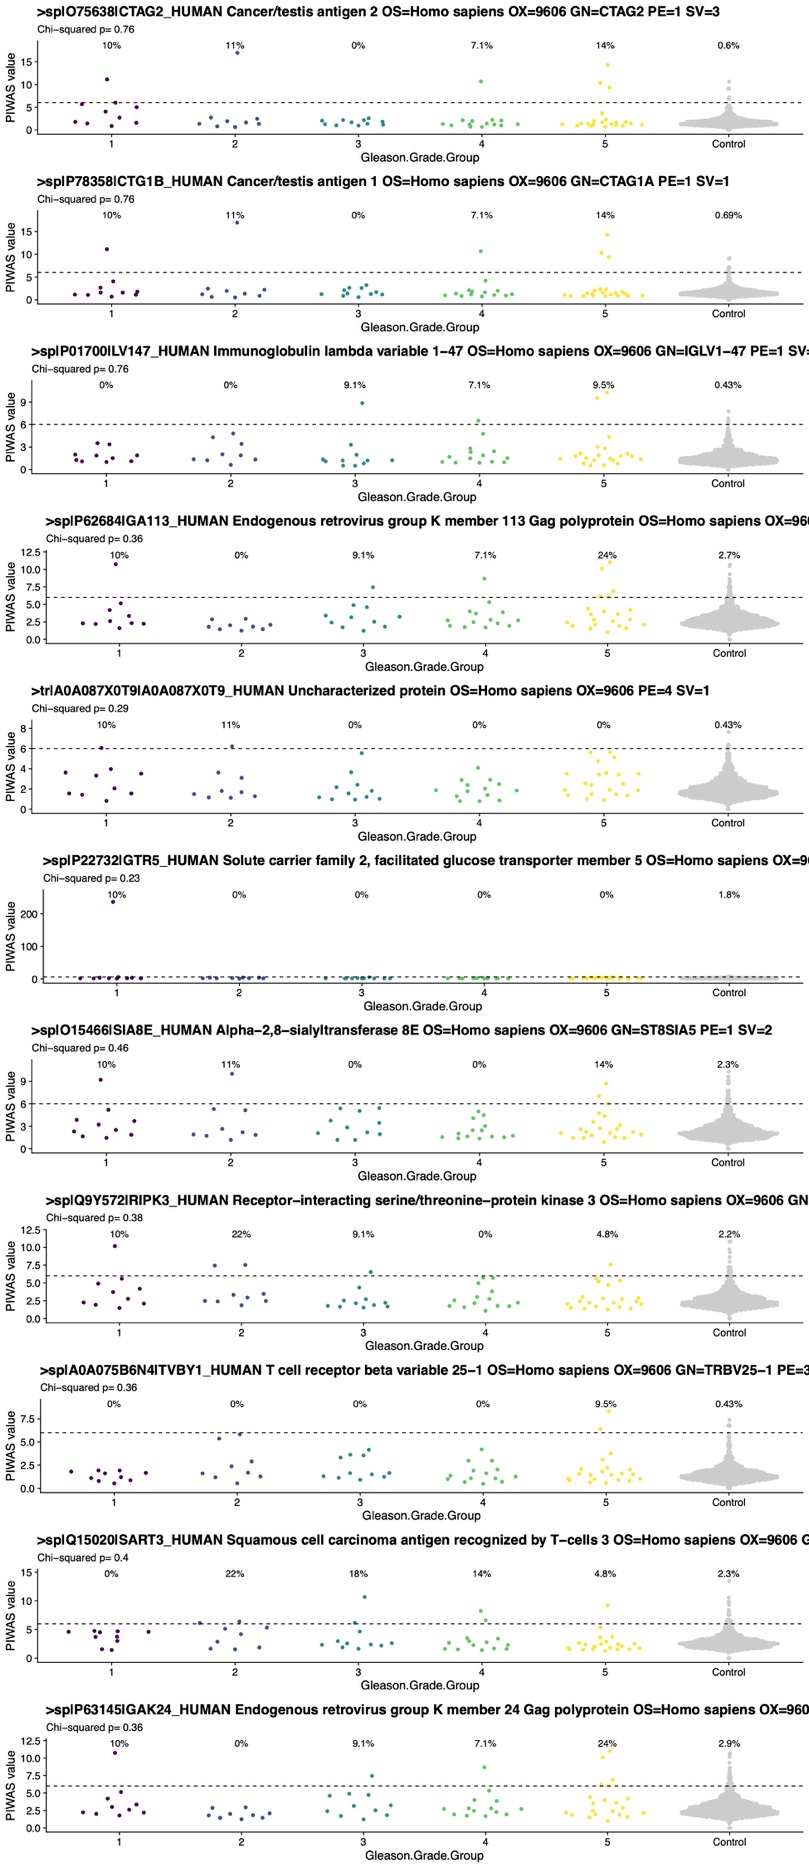


Figure S5. Autoantibody enrichment frequencies stratified by Gleason Grade Group.


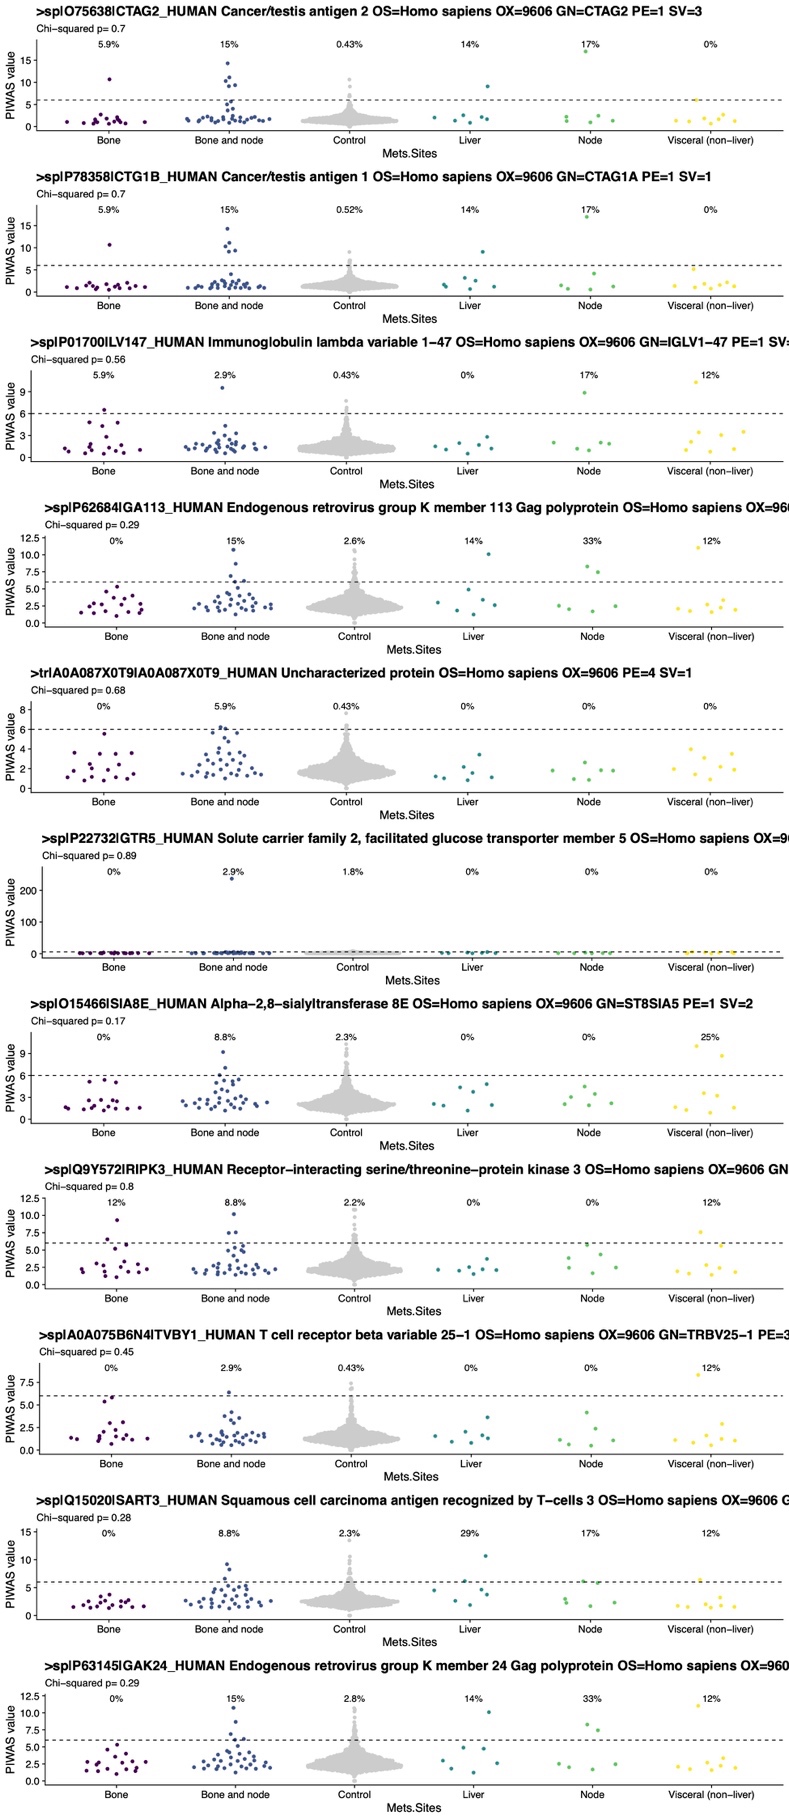


Figure S6. Autoantibody enrichment frequencies stratified by sites of metastasis at time of specimen collection (first timepoint available).


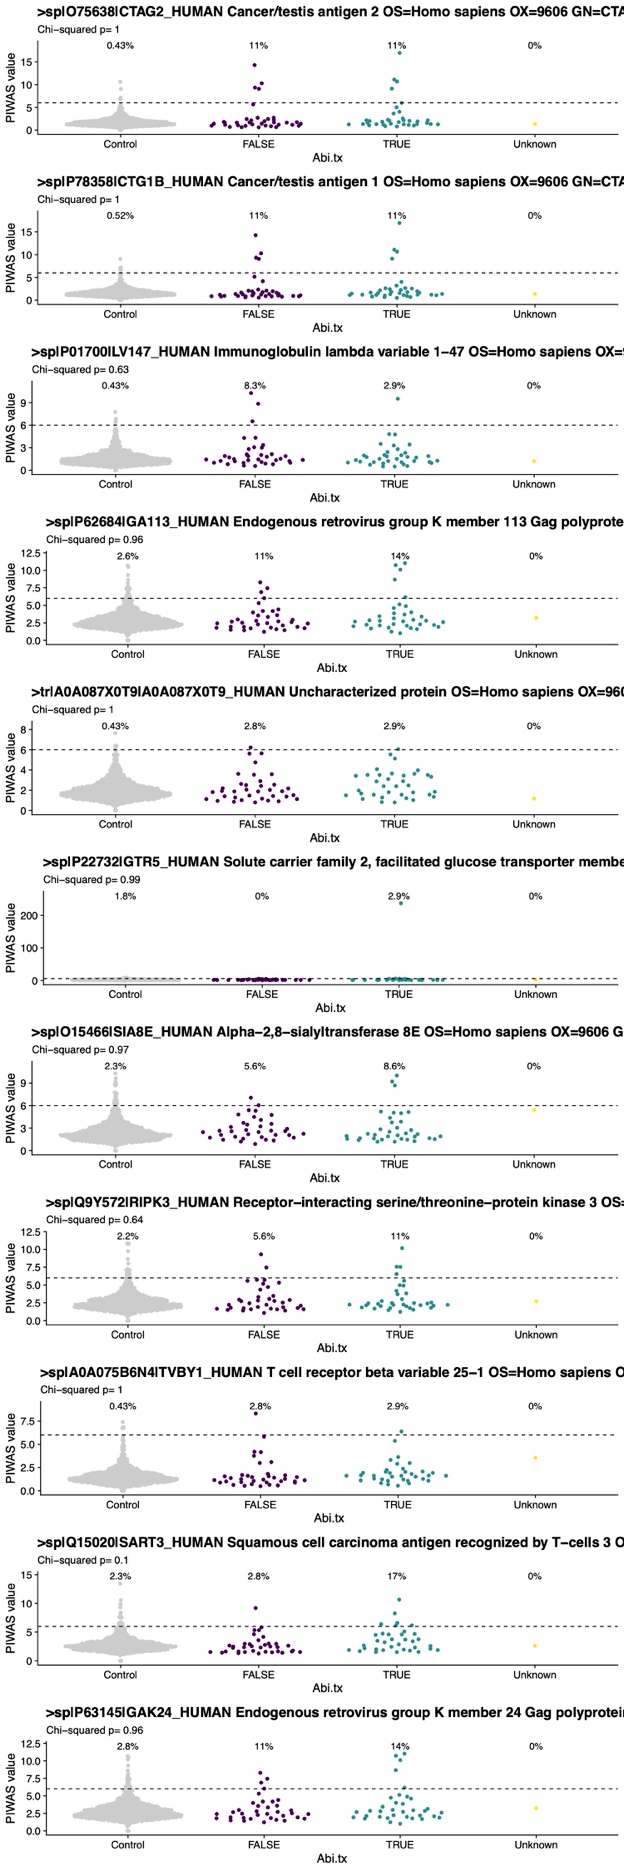


Figure S7. Autoantibody enrichment frequencies stratified by prior abiraterone treatment status at time of specimen collection (first timepoint available).


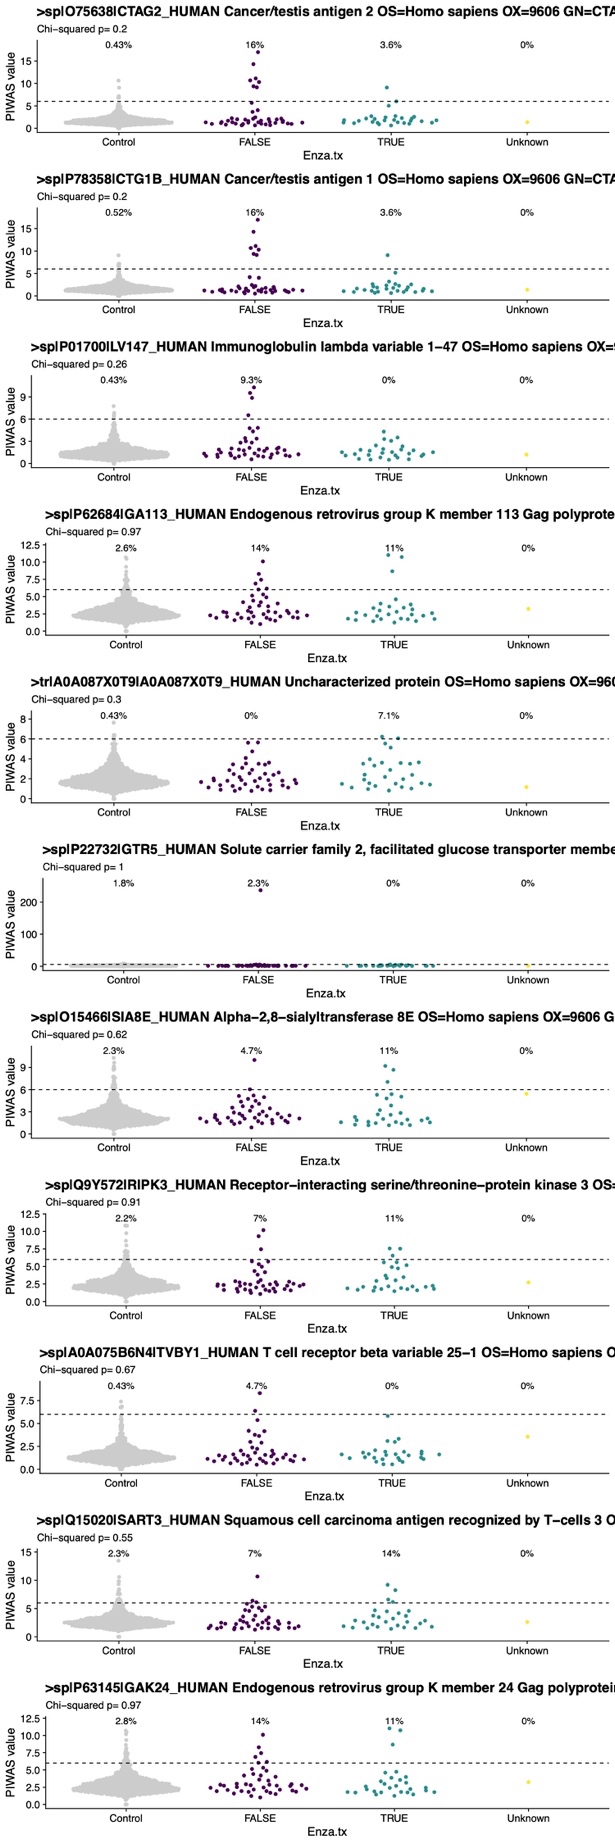


Figure S8. Autoantibody enrichment frequencies stratified by prior enzalutamide treatment status at time of specimen collection (first timepoint available).


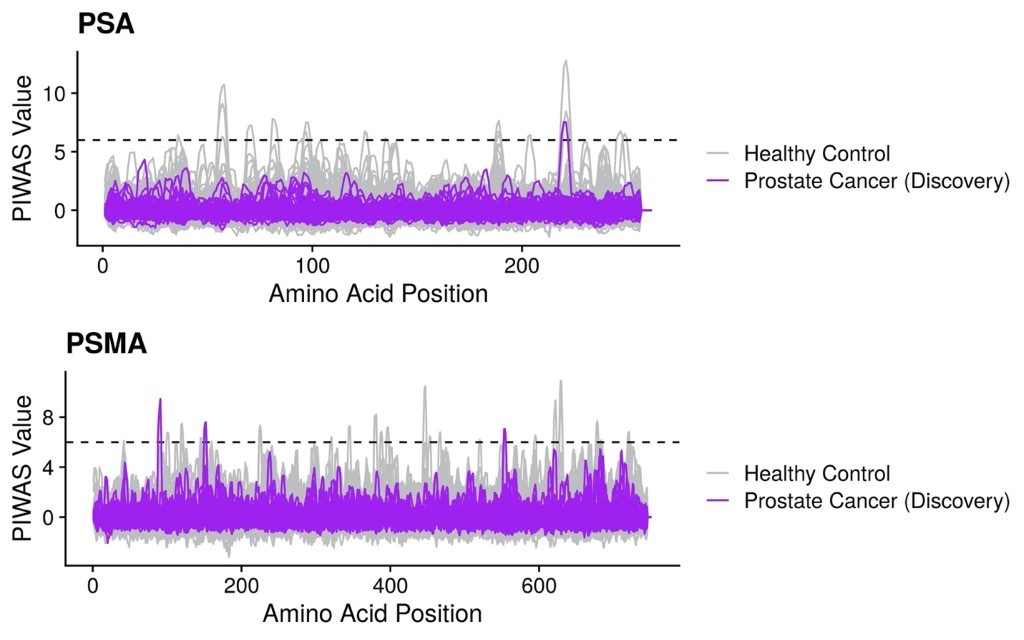


Figure S9. PIWAS tiling plot showing antibody enrichment of every sub-peptide of PSA and PSMA in healthy controls (*N*=1,157) and prostate cancer patients (*N*=72).
